CORRECTION

# Correction: Evaluation of High-Throughput Genomic Assays for the Fc Gamma Receptor Locus

**Chantal E. Hargreaves, Chisako Iriyama, Matthew J. J. Rose-Zerilli, Sietse Q. Nagelkerke, Khyam Hussain, Rosalind Ganderton, Charlotte Lee, Lee R. Machado, Edward J. Hollox, Helen Parker, Kate V. Latham, Taco W. Kuijpers, Kathleen N. Potter, Sarah E. Coupland, Andrew Davies, Michael Stackpole, Melanie Oates, Andrew R. Pettitt, Martin J. Glennie, Mark S. Cragg, Jonathan C. Strefford**

[Fig 4](#) is incorrect. The figure is an older version, which contains an inaccurate summary of data. The authors have provided a corrected version here.

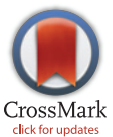

 OPEN ACCESS

**Citation:** Hargreaves CE, Iriyama C, Rose-Zerilli MJJ, Nagelkerke SQ, Hussain K, Ganderton R, et al. (2016) Correction: Evaluation of High-Throughput Genomic Assays for the Fc Gamma Receptor Locus. PLoS ONE 11(3): e0145040. doi:10.1371/journal.pone.0145040

**Published:** March 23, 2016

**Copyright:** © 2016 Hargreaves et al. This is an open access article distributed under the terms of the [Creative Commons Attribution License](#), which permits unrestricted use, distribution, and reproduction in any medium, provided the original author and source are credited.

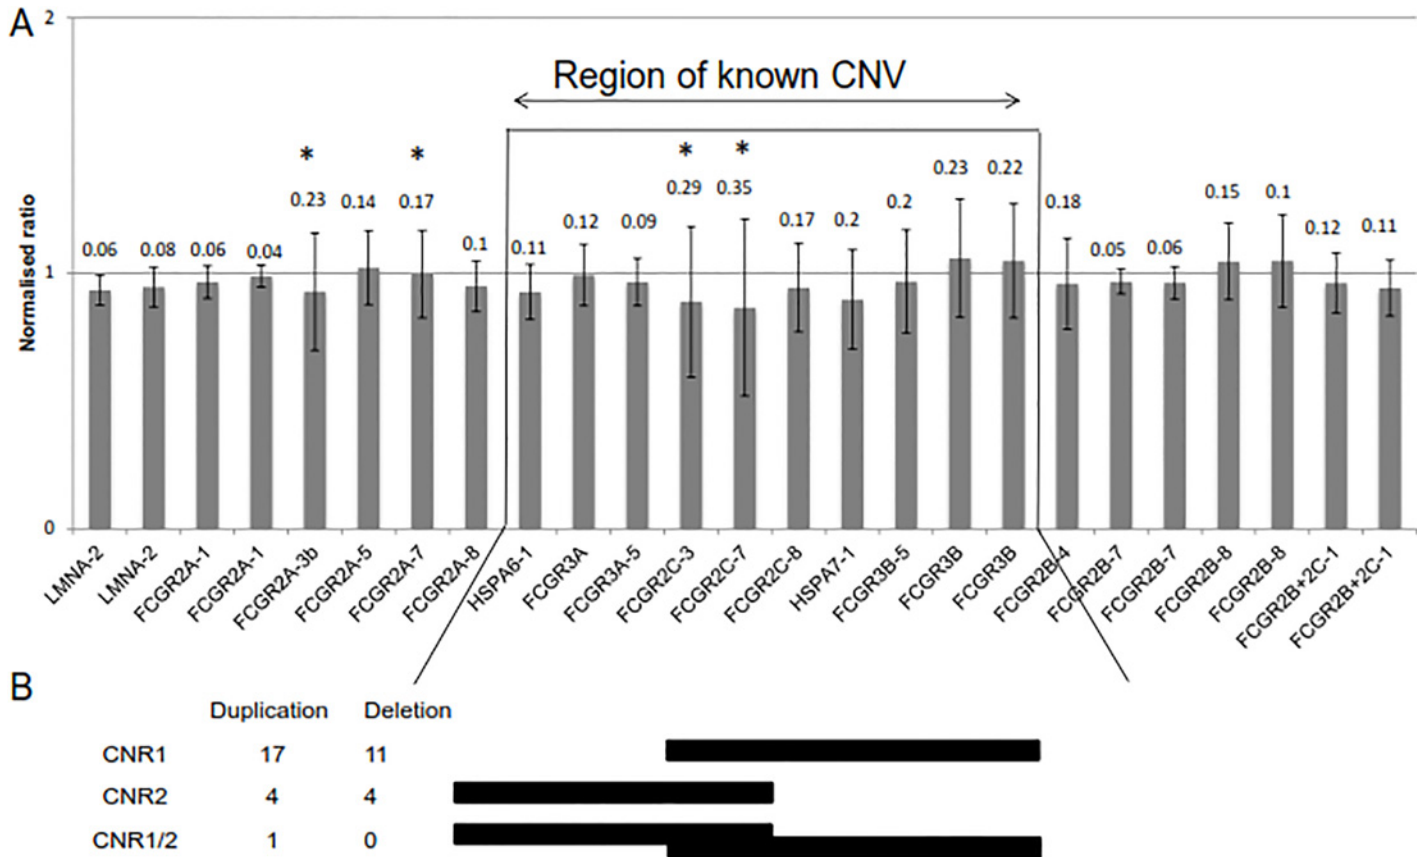

**Fig 4. Performance of FcγR-targeted probes in healthy donors.** (A) Probe binding performance was assessed by measuring the mean and SD of individual probes across our cohort of 164. Probes are represented in locus order. A normalised peak height ratio of 1 represents a diploid copy number. Error bars represent the mean +/- SD and the SD is shown above each probe. (B) Copy number regions (CNRs) 1 and 2 in healthy donors with observed numbers of duplication and deletion events. One donor showed CNV likely to include two duplications; one of the distal part containing *FCGR2C* and *FCGR3B* (CNR1) on one chromosome and one of the proximal part containing *FCGR3A* and *FCGR2C* (CNR2) on the other chromosome. \* Probes in which the variability is a result of known genomic SNPs targeted by the probe.

doi:10.1371/journal.pone.0145040.g001

## Reference

- Hargreaves CE, Iriyama C, Rose-Zerilli MJJ, Nagelkerke SQ, Hussain K, Ganderton R, et al. (2015) Evaluation of High-Throughput Genomic Assays for the Fc Gamma Receptor Locus. PLoS ONE 10 (11): e0142379. doi:10.1371/journal.pone.0142379 PMID: 26545243
